# Supplementary material for: Complementary Metagenomic Approaches Improve Reconstruction of Microbial Diversity in a Forest Soil
Source: PubMed Central journal article supplement (PMC7065516; doi:10.1128/msystems.00768-19), 2020-03-10

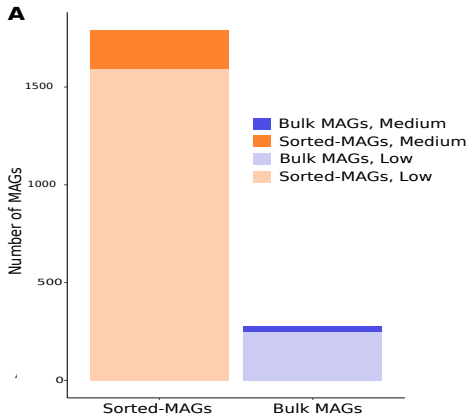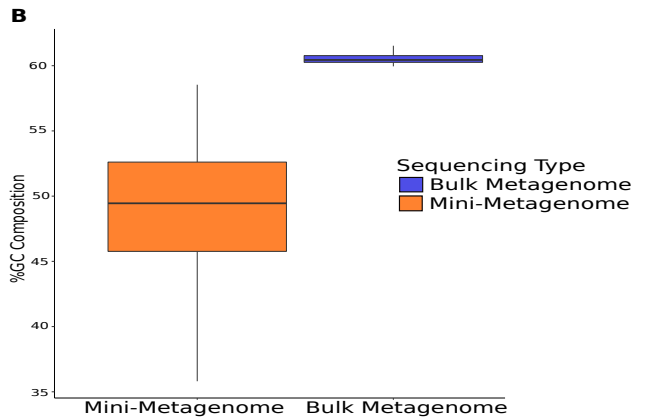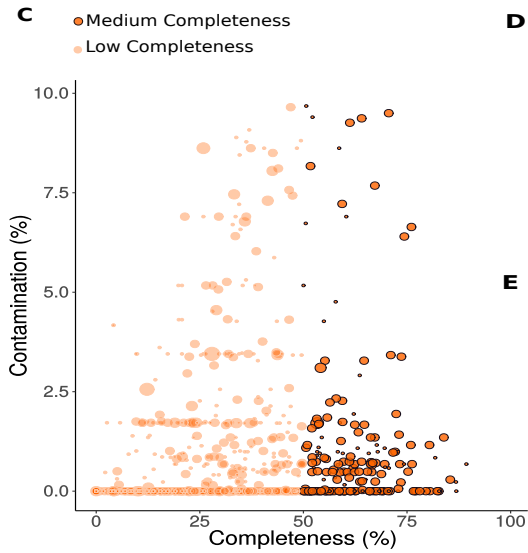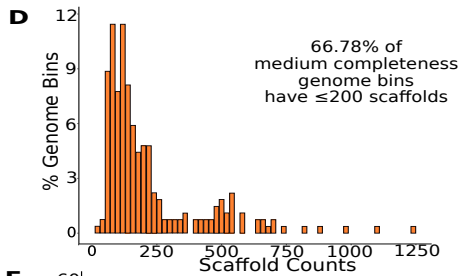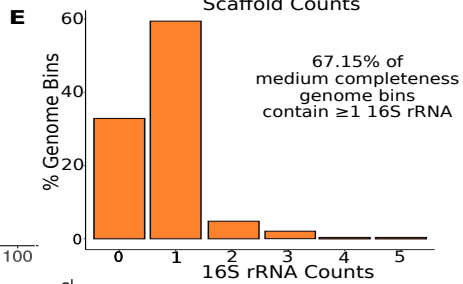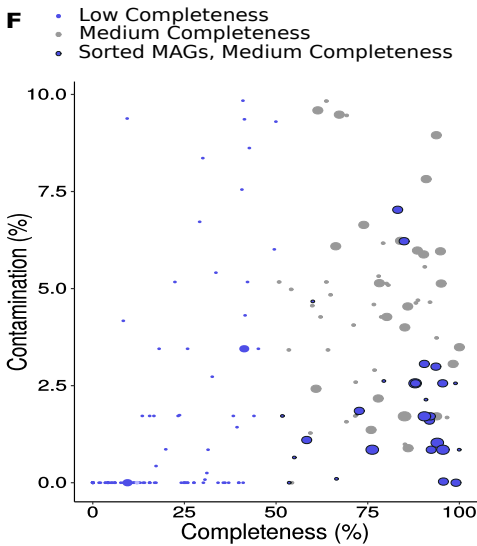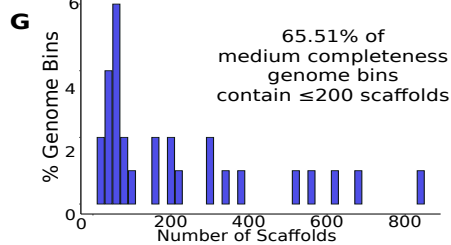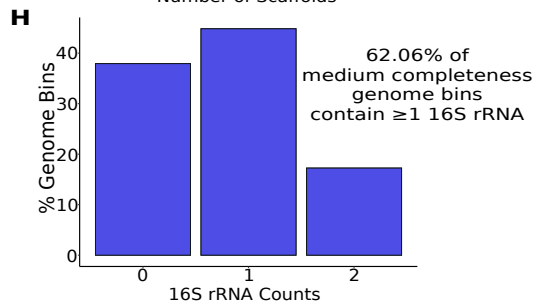

Supplement: mSystems.00768-19-sf001.pdf [file mSystems.00768-19-sf001.pdf]
